# Supplementary material
Source: ML conference proceedings conference paper supplement (https://openaccess.thecvf.com/content/ICCV2021/html/Zhang_DeepPanoContext_Panoramic_3D_ICCV_2021_paper.html)
Supplement: Supplementary file 2 [file Zhang_DeepPanoContext_Panoramic_3D_ICCV_2021_supplemental.zip]

Archive with 3 entries (3 files):
- 07881-supp.pdf
- Animation_of_Figure_A_in_Supplementary_Material.mp4
- README.txt
