# Supplementary material
Source: ML conference proceedings conference paper supplement (https://openaccess.thecvf.com/content/ICCV2021/html/Zhang_DeepPanoContext_Panoramic_3D_ICCV_2021_paper.html)
Supplement: Supplementary file 2 [file Zhang_DeepPanoContext_Panoramic_3D_ICCV_2021_supplemental.zip › README.txt]

Our supplementary materials contain a PDF that provides additional details of our method and experiment, and a video that visualizes the proposed relation optimization (i.e., Fig. A in the supplementary material).
For more details of how the relation optimization visualization experiment in the video is conducted, please refer to Sec. C in the supplementary material.
